# Supplementary material
Source: publisher figshare collection journal article supplement (https://acs.figshare.com/ndownloader/files/5090779)
Supplement: Supplementary file 1 [file 5090779]

## SUPPORTING INFORMATION

To check that the decrease in the amide I signal of fibrinogen on PEU was not a consequence of the input laser beams, a time course study of the  $1650\text{ cm}^{-1}$  peak was performed (Figure S1). During the collection of the time course study in the amide I range, the IR and visible input beams were blocked on three occasions. These times are indicated by arrows in Figure 8. The trend observed is unaffected by the presence or absence of the input laser beams, indicating that the attenuation is not caused by a laser irradiation effect, rather the loss of signal is a result of changes in the protein structure due to polymer-protein interactions. A time course study of the  $3275\text{ cm}^{-1}$  peak was also performed, and a strong correlation between the behavior of the  $3275$  and  $1650\text{ cm}^{-1}$  peaks was observed. The small difference might be due to the small water signal variation overlapped with the N-H signal at  $3275\text{ cm}^{-1}$ .

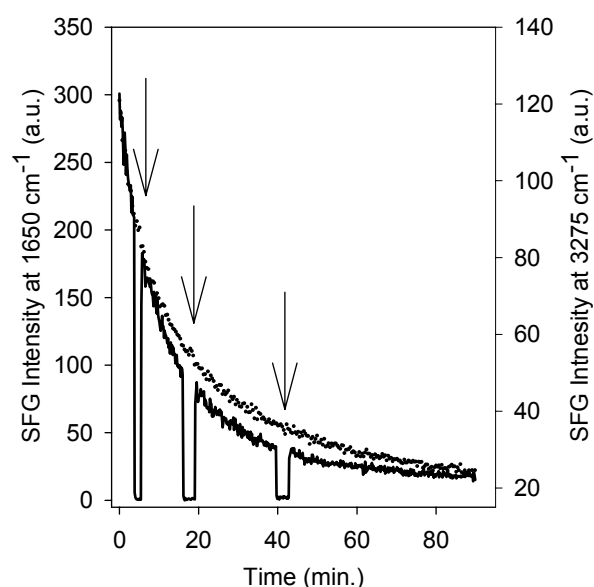

**Figure S1.** SFG time course study of fibrinogen solution contacting PEU, measuring peak intensities at  $1650\text{ cm}^{-1}$  (solid line) and  $3275\text{ cm}^{-1}$  (dots). Arrows indicate times where the input laser beams were blocked for the  $1650\text{ cm}^{-1}$  experiment.

Fitting of SFG data was performed using eq. 1 in the text. Peak centers and widths were selected based on literature results (refs. 17 and 58 in the text), these values were kept constant for all samples. A peak was added to the PEU and SPCU samples to account for the polymer C=O group, 1703 and 1720  $\text{cm}^{-1}$  respectively. A nonresonant background signal was included in the fitting. The intensities of the fitted peaks for the polymer with adsorbed fibrinogen/PBS interface are shown in Table S1.

**Table S1.** SFG fitting parameters of polymers with adsorbed fibrinogen/PBS interface after adsorption times from 10-90 minutes. Center and width values are in  $\text{cm}^{-1}$ . The intensity values, A, are reported for the spectra taken at each time interval.

**PEU with adsorbed fibrinogen/PBS interface**

| Center | Width | A10 | A20 | A30 | A40 | A50 | A60 | A70 | A80 | A90 |
|--------|-------|-----|-----|-----|-----|-----|-----|-----|-----|-----|
| 1600   | 10    | 4   | 4   | 4   | 4   | 4   | 4   | 4   | 4   | 5   |
| 1620   | 12    | 10  | 10  | 8   | 5   | 5   | 5   | 5   | 5   | 8   |
| 1635   | 13    | 45  | 40  | 38  | 35  | 30  | 25  | 25  | 25  | 22  |
| 1650   | 12    | 123 | 105 | 95  | 88  | 83  | 80  | 72  | 66  | 60  |
| 1668   | 11    | 5   | 5   | 5   | 5   | 5   | 5   | 5   | 5   | 15  |
| 1685   | 10    | 2   | 2   | 2   | 2   | 2   | 2   | 2   | 2   | 2   |
| 1703   | 12    | 12  | 15  | 15  | 20  | 20  | 18  | 18  | 19  | 20  |

**SPCU with adsorbed fibrinogen/PBS interface**

| Center | Width | A10 | A20 | A30 | A40 | A50 | A60 | A70 | A80 | A90 |
|--------|-------|-----|-----|-----|-----|-----|-----|-----|-----|-----|
| 1600   | 10    | 2   | 2   | 2   | 2   | 2   | 2   | 2   | 2   | 2   |
| 1620   | 12    | 4   | 4   | 4   | 4   | 4   | 4   | 4   | 4   | 5   |
| 1635   | 13    | 39  | 39  | 34  | 39  | 39  | 32  | 32  | 32  | 25  |
| 1650   | 12    | 138 | 140 | 149 | 145 | 150 | 149 | 149 | 144 | 160 |
| 1668   | 11    | 15  | 15  | 15  | 15  | 15  | 15  | 15  | 15  | 10  |
| 1685   | 10    | 3   | 3   | 3   | 3   | 3   | 3   | 3   | 3   | 2   |
| 1720   | 12    | 0   | 0   | 0   | 0   | 0   | 0   | 0   | 0   | 0   |

**PFP with adsorbed fibrinogen/PBS interface**

| Center | Width | A10 | A20 | A30 | A40 | A50 | A60 | A70 | A80 | A90 |
|--------|-------|-----|-----|-----|-----|-----|-----|-----|-----|-----|
| 1600   | 10    | 15  | 15  | 15  | 15  | 15  | 15  | 15  | 15  | 15  |
| 1620   | 12    | 30  | 30  | 30  | 30  | 30  | 30  | 30  | 30  | 25  |
| 1635   | 13    | 85  | 85  | 85  | 85  | 85  | 85  | 85  | 85  | 85  |
| 1650   | 12    | 170 | 190 | 195 | 197 | 194 | 193 | 187 | 190 | 190 |
| 1668   | 11    | 20  | 20  | 20  | 20  | 20  | 20  | 20  | 20  | 20  |
| 1685   | 10    | 2   | 2   | 2   | 2   | 2   | 2   | 2   | 2   | 2   |
